# Supplementary material for: Supplementing RP-Arg during the gestation and lactation periods of grazing sheep reprograms liver metabolism in offspring lambs by increasing IGF-1 in milk
Source: Research Square preprint supplement (doi:10.21203/rs.3.rs-7805924/v1), 2025-11-13
Supplement: Supplementary file 1 [file 0d2d8282bab97bc24a28e6c2.docx]

**Table S1. Genes related to intestinal barrier function and inflammation**

| **Genes** | **Accession number** | **Primer sequence（5’—3’）** |
| --- | --- | --- |
| *β-Actin* | XM_004013078.5 | Forward: CAGCCGTCCTTCCTGGGTAT  Reverse: ATCTGCTCGCAGTCCGTTT |
| *IL-2* | NM_001009806.1 | Forward: TGCCCAAGGTTAACGCTACA  Reverse: ACAGCCTTTACTGTCGCATC |
| *TNF-α* | NM_001024860.1 | Forward: CCAGGCAACTTGCTCTCTCA  Reverse: CGCTGATGTTGGCTACAACG |
| *IL-4* | NM_001009313.3 | Forward: CTGCCCCAAAGAACGCAAC  Reverse: AGATTCCTGTCAAGTCCGCC |
| *IL-10* | NM_001009327.1 | Forward: CAGCTGTACCCACTTCCCAG  Reverse: CCCCTCTCTTGGAGCATATTGA |
| *ZO-1* | XM_042235170.2 | Forward: CCTTTCCGACAGCATCCACT  Reverse: TACACAGGCTTTGGCTCTGG |
| *Occludin* | XM_015101255.4 | Forward: TACCACTCCTCCTCCGTAGC  Reverse: AGATGAGTCAATCTGCGGCT |
| *Claudin-1* | XM_004003313.5 | Forward: GCTTGGGGTTTGTGGTTTCA  Reverse: TTGCACAGAGACCTGCGATG |
| *PI3K* | XM_027961508.2 | Forward: GACTGGCAACCCAGAACTGA  Reverse: CCGAGACACCACAGCTGAAT |
| *Akt* | XM_027956972.3 | Forward: TTCAAGCCTCAGGTCACGTC  Reverse: CCACCCAAACGCATCCAGAA |

**Table S2. Significance analysis of differential bacterial taxa at phylum and genus levels**

| **Item** | **Treatments1** | | | **SEM** | ***P*-value** |
| --- | --- | --- | --- | --- | --- |
| **CON** | **SF** | **ARG** |
| Phylum |  |  |  |  |  |
| *Frimicutes* | 0.79 | 0.86 | 0.78 | 0.07 | 0.645 |
| *Proteobacteria* | 0.21 | 0.13 | 0.18 | 0.07 | 0.696 |
| *Actinobacteriota* | 0.01 | 0.01 | 0.03 | 0.01 | 0.138 |
| *Bacteroidota* | 0.01 | 0.01 | 0.23 | 0.01 | 0.087 |
| Genus |  |  |  |  |  |
| *Limosilactobacillus* | 0.27 | 0.45 | 0.38 | 0.07 | 0.322 |
| *Lactobacillus* | 0.49 | 0.34 | 0.14 | 0.07 | 0.079 |
| *Escherichia* | 0.20 | 0.12 | 0.15 | 0.07 | 0.698 |

1 CON=Grazing only；SF=Grazing + 300 g/day concentrate；ARG=SF + 30 g/day RP-Arg

**Supplementary Abbreviations**

Ala: Alanine

ALB: Albumin

ALP: Alkaline phosphatase

ALT: Alanine aminotransferase

Arg: Arginine

Asp: Aspartic acid

AST: Aspartate aminotransferase

BUN: Blood urea nitrogen

Ca: Calcium

CD: Crypt depth

CK: Creatine kinase

CP: Crude Protein

CREA: Creatinine

Cys: Cysteine

DAMs: Differentially abundant metabolites

EGF: Epidermal growth factor

GH: Growth hormone

GLU: Glucose

Glu: Glutamic acid

Gly: Glycine

GSSG: Oxidized glutathione

H&E: Hematoxylin and eosin

HCL: Hydrochloric acid

His: Histidine

IGF-1: Insulin-like growth factor 1

IHC: Immunohistochemical

IL-10: Interleukin-10

IL-1β: Interleukin-1beta

IL-2: Interleukin-2

IL-4: Interleukin-4

IL-6: Interleukin-6

Ile: Isoleucine

IUGR: Intrauterine growth restriction

KEGG: Kyoto Encyclopedia of Genes and Genomes

LDH: Lactate dehydrogenase

LEfSe: Linear discriminant analysis effect size

Leu: Leucine

LF: Lactoferrin

Lys: Lysine

Met: Methionine

OPLS-DA: Orthogonal projections to latent structures discriminant analysis

Phe: Phenylalanine

Pro: Proline

RP-Arg: Rumen-protected arginine

SCFAs: Short-chain fatty acids

Ser: Serine

SNF: Solid non-fat

TCA: Tricarboxylic acid cycle

TGF-β: Transforming growth factor-beta

Thr: Threonine

TNF-α: Tumor necrosis factor-alpha

TP: Total protein

Tyr: Tyrosin

UA: Uric acid

Val: Valine

VH: Villus height

VH:CD: The villus height/deep layer

ZO-1: Zonula Occludens-1
